# Supplementary material for: A systematic study of work function and electronic properties of MXenes from first principles
Source: Royal Society of Chemistry journal article supplement (doi:10.1039/d2na00830k), 2023-01-01
Supplement: d2na00830k1.pdf [file d2na00830k1.pdf]

## Support information

### A systematic study of work function and electronic properties of MXenes from first principles

Khabib Yusupov<sup>1</sup>, Jonas Björk<sup>1</sup>, Johanna Rosen<sup>1</sup>

<sup>1</sup>Division of Materials Design, Department of Physics, Chemistry, and Biology, Linköping University, Linköping, Sweden, 581 83

Table S. 1. Position of the terminating species with respect to the M and X elements of the MXene.

| Structures                     | Type of cite (FCC or HCP) with respect to T <sub>z</sub> |     |     |     |     |     |     |     |
|--------------------------------|----------------------------------------------------------|-----|-----|-----|-----|-----|-----|-----|
|                                | O                                                        | NH  | N   | S   | F   | Cl  | Br  | I   |
| Ti <sub>2</sub> C              | FCC                                                      | FCC | HCP | FCC | FCC | FCC | FCC | FCC |
| Ti <sub>3</sub> C <sub>2</sub> | FCC                                                      | FCC | HCP | FCC | FCC | FCC | FCC | FCC |
| Nb <sub>2</sub> C              | FCC                                                      | HCP | FCC | FCC | FCC | FCC | FCC | FCC |
| Nb <sub>4</sub> C <sub>3</sub> | FCC                                                      | HCP | FCC | HCP | HCP | HCP | HCP | HCP |
| Mo <sub>2</sub> C              | HCP                                                      | HCP | HCP | HCP | FCC | FCC | FCC | FCC |
| V <sub>2</sub> C               | FCC                                                      | FCC | FCC | FCC | FCC | FCC | FCC | FCC |

Table S. 2. MXenes with corresponding T<sub>z</sub>. The represented values of WF are only those that were reported before in the literature<sup>12,37</sup>. The green frame reflects unreported MXene/T<sub>z</sub> combinations and their WF. Empty slots are of the reported structures but no WF data.

| Termination                      | O    | NH   | N    | S    | F    | Cl   | Br   | I    |
|----------------------------------|------|------|------|------|------|------|------|------|
| Presence of work function values |      |      |      |      |      |      |      |      |
| Ti <sub>2</sub> C                | 5.80 | 3.02 |      | 6.03 | 5.04 | 4.64 | 4.32 | 3.81 |
| Ti <sub>3</sub> C <sub>2</sub>   | 6.16 |      |      | 6.15 | 4.98 | 4.50 | 4.11 | 3.56 |
| Nb <sub>2</sub> C                | 5.81 |      |      |      | 4.48 |      | 3.95 | 3.73 |
| Nb <sub>4</sub> C <sub>3</sub>   | 5.77 | 3.36 | 5.69 | 6.04 | 4.97 | 4.14 | 3.78 | 3.26 |
| Mo <sub>2</sub> C                | 7.39 | 2.47 | 6.58 |      | 5.74 |      |      | 3.77 |
| V <sub>2</sub> C                 | 6.68 | 2.94 | 6.33 |      | 5.52 |      | 6.19 | 5.01 |

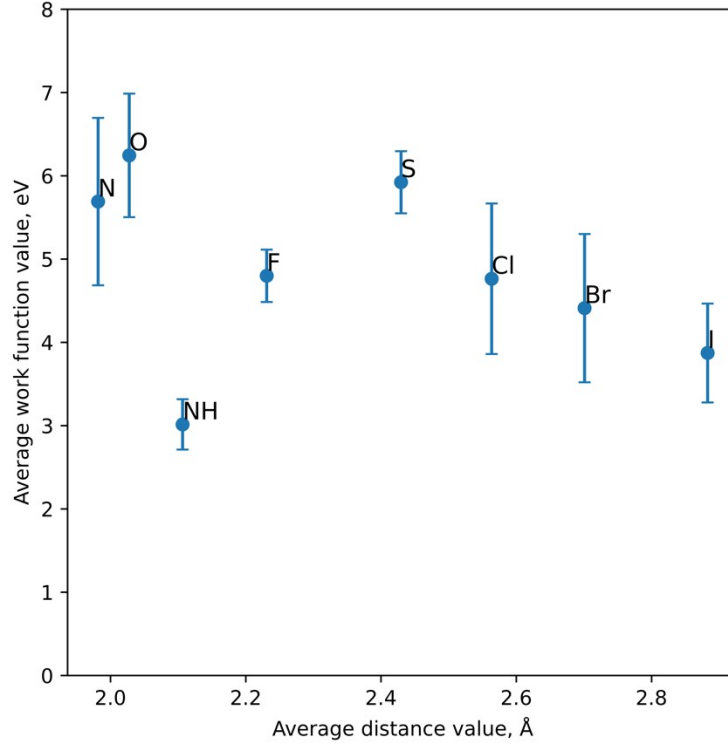

Figure S. 1. Relation between the average work function and the average distance between the M element and the closest termination. The values are averaged over the data for the 6 studied MXenes presented in Figure 2a and 2d of the main paper. The graph confirms the general correlation between a reduced WF and a larger distance between the M element and the termination (apart from for NH which is discussed separately due to an internal dipole moment).

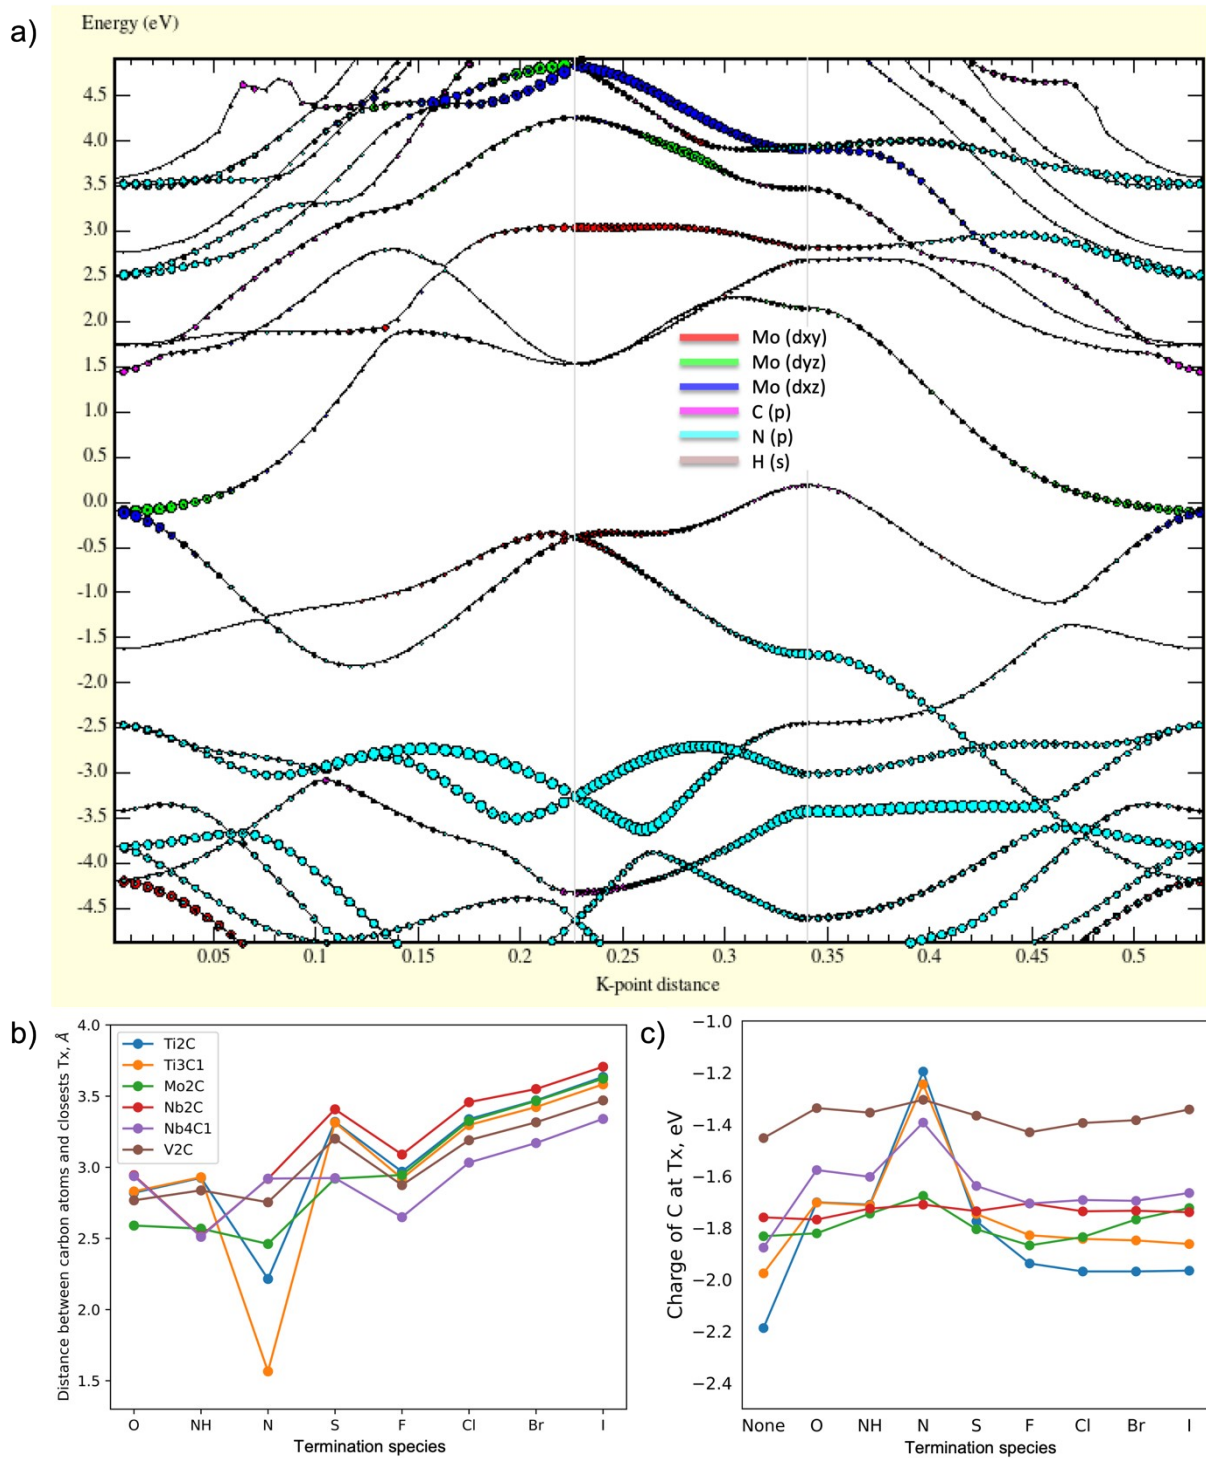

Figure S. 2. a) Band structure of  $\text{Mo}_2\text{C}(\text{NH})_2$  MXene with projected bands of Mo d- and  $T_z$  p/s-orbitals; b) influence of  $T_z$  elements on the distance between X and  $T_z$  distance c) Charges of carbon atoms for the MXenes with associated terminations

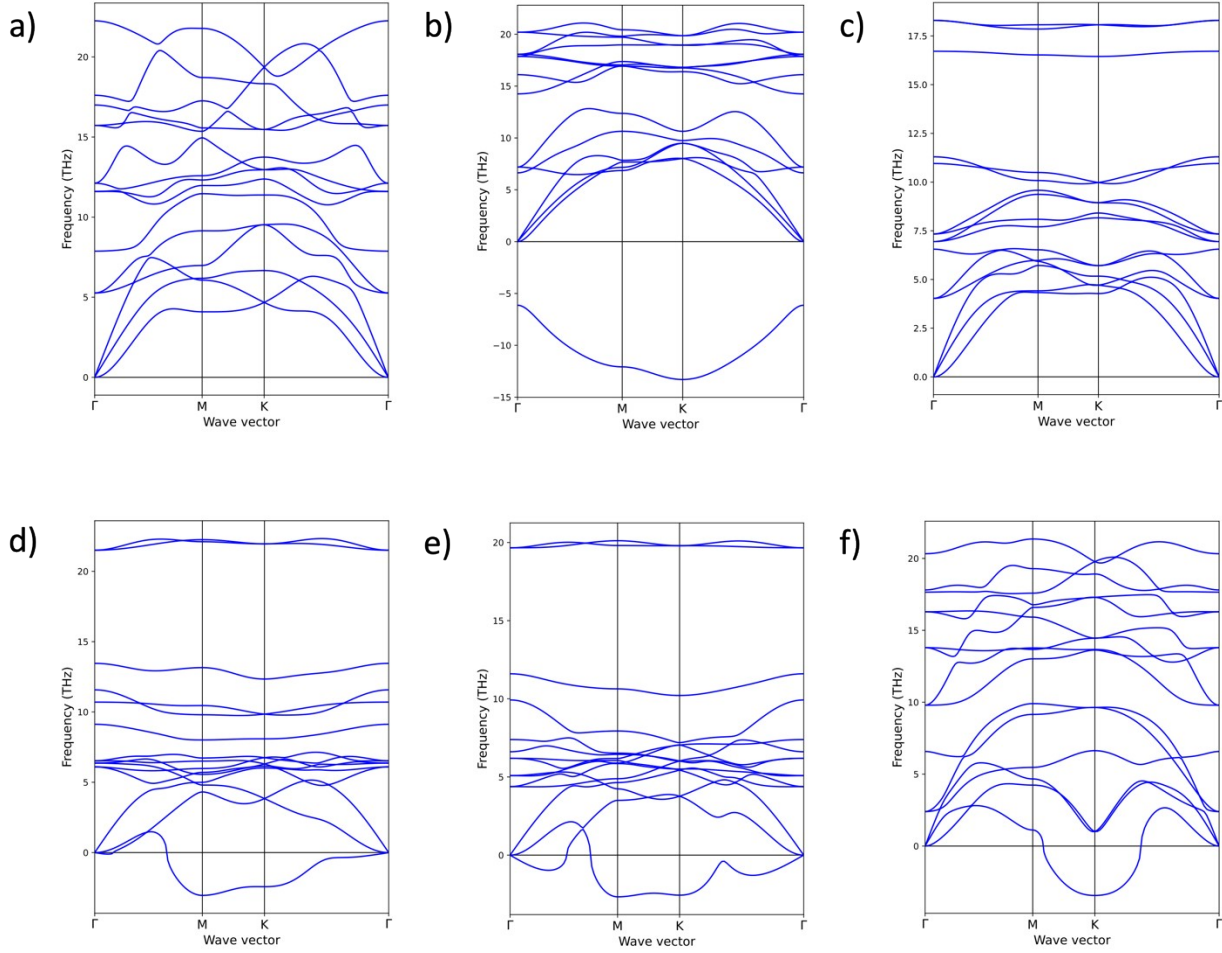

Figure S. 3. Phonon dispersion for a)  $Ti_2CO_2$ , b)  $Ti_2CN_2$ , c)  $Nb_2CN_2$ , d)  $Mo_2CF_2$ , e)  $Mo_2CCl_2$ , and f)  $V_2CN_2$

We have included the phonon spectra of the MXenes with predicted semiconducting nature. These results highlight that most semiconducting MXenes are not obtainable, and further analysis is therefore not being pursued, and attempts for experimental verification is not recommended. The phonon spectra of  $Ti_2CO_2$  and  $Nb_2CN_2$  exhibit no negative frequencies and are therefore considered to be dynamically stable.

Table S. 3. Energy gaps of Semi-metallic MXenes. The structure marked by green is the one that was not reported in the literature previously.

| MXene          | $Ti_2CO_2$ | $Ti_2CN_2$ | $Nb_2CN_2$ | $Mo_2CF_2$ | $Mo_2CCl_2$ | $Nb_2CN_2$ |
|----------------|------------|------------|------------|------------|-------------|------------|
| Energy gap, eV | 0.33       | 1.0        | 0.2        | 0.24       | 0.11        | 0.211      |
